# Supplementary material for: Tead proteins activate theFoxa2enhancer in the node in cooperation with a second factor
Source: Oxford University Press journal article supplement (doi:10.1242/dev.02059), 2005-10-06
Supplement: dev02059supptable1.pdf [file dev02059supptable1.pdf]

**Table S1. Effects of Tead-EnR on notochord development**

| Plasmids | Total number | Notochord     |                     |            |
|----------|--------------|---------------|---------------------|------------|
|          |              | Normal        | Normal              | Absent     |
|          |              | AP expression |                     |            |
|          |              | Endoderm      | Endoderm, Notochord | Endoderm   |
| Control  | 6            | 2 (33.3%)     | 4 (67.7%)           | 0          |
| Tead-EnR | 16           | 6 (37.5%)     | 0                   | 10 (62.5%) |
